# Supplementary material for: Interferon Regulatory Factor 3-Mediated Signaling Limits Middle-East Respiratory Syndrome (MERS) Coronavirus Propagation in Cells from an Insectivorous Bat
Source: MDPI journal article supplement (doi:10.3390/v11020152), 2019-02-13
Supplement: s1 [file s1]

Supplementary

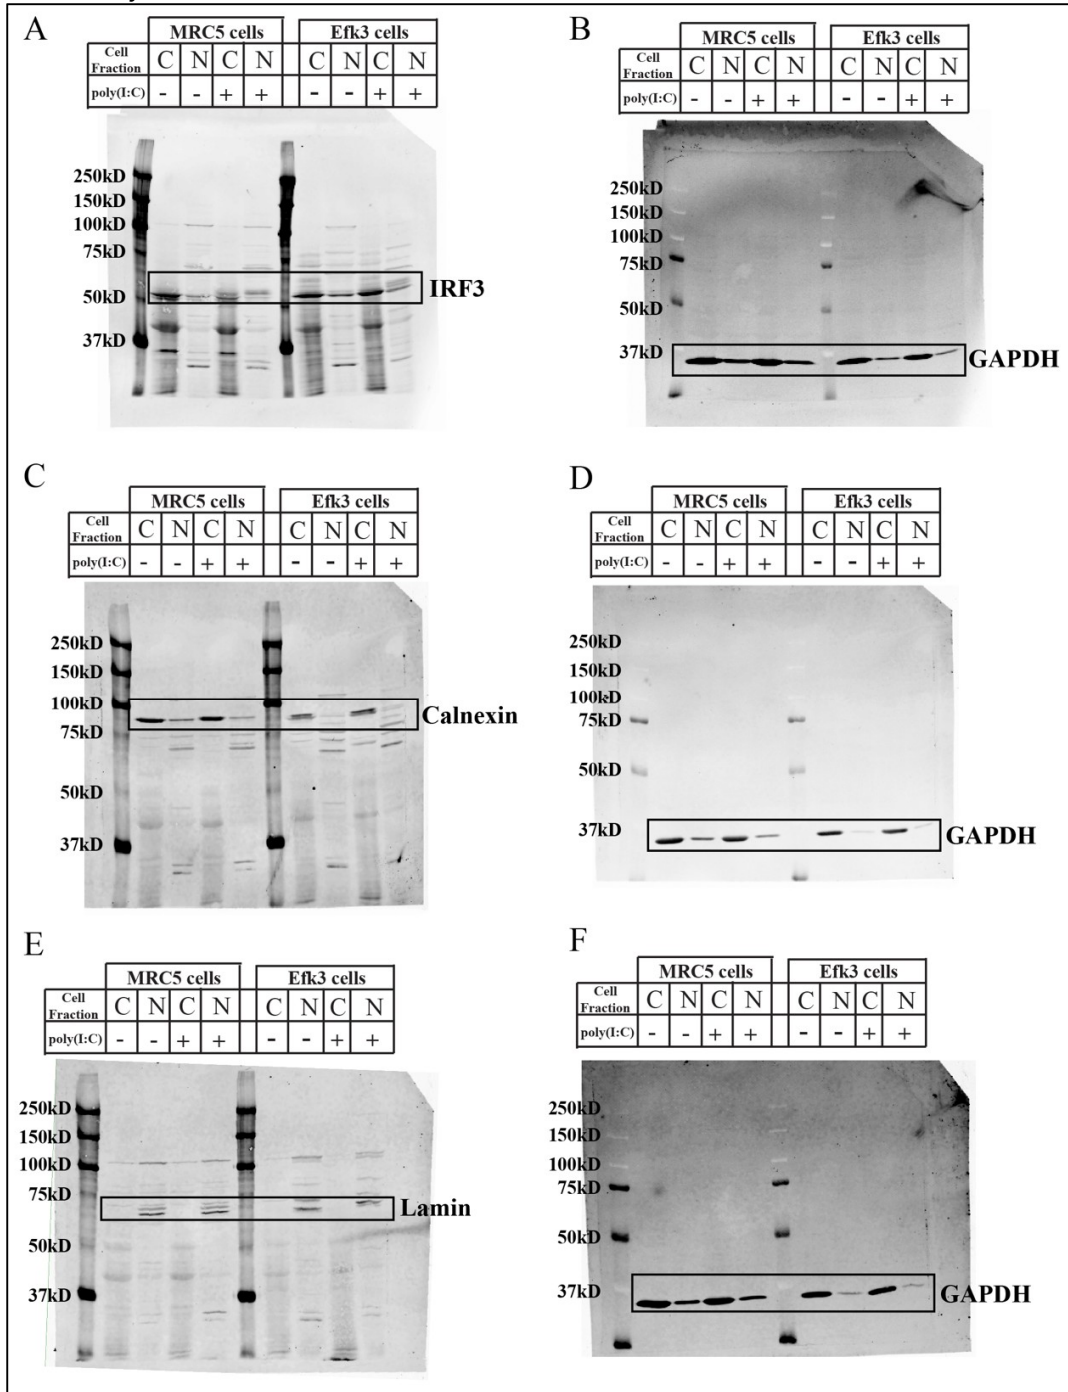

Figure S1. Full size blots for Figure 3C.

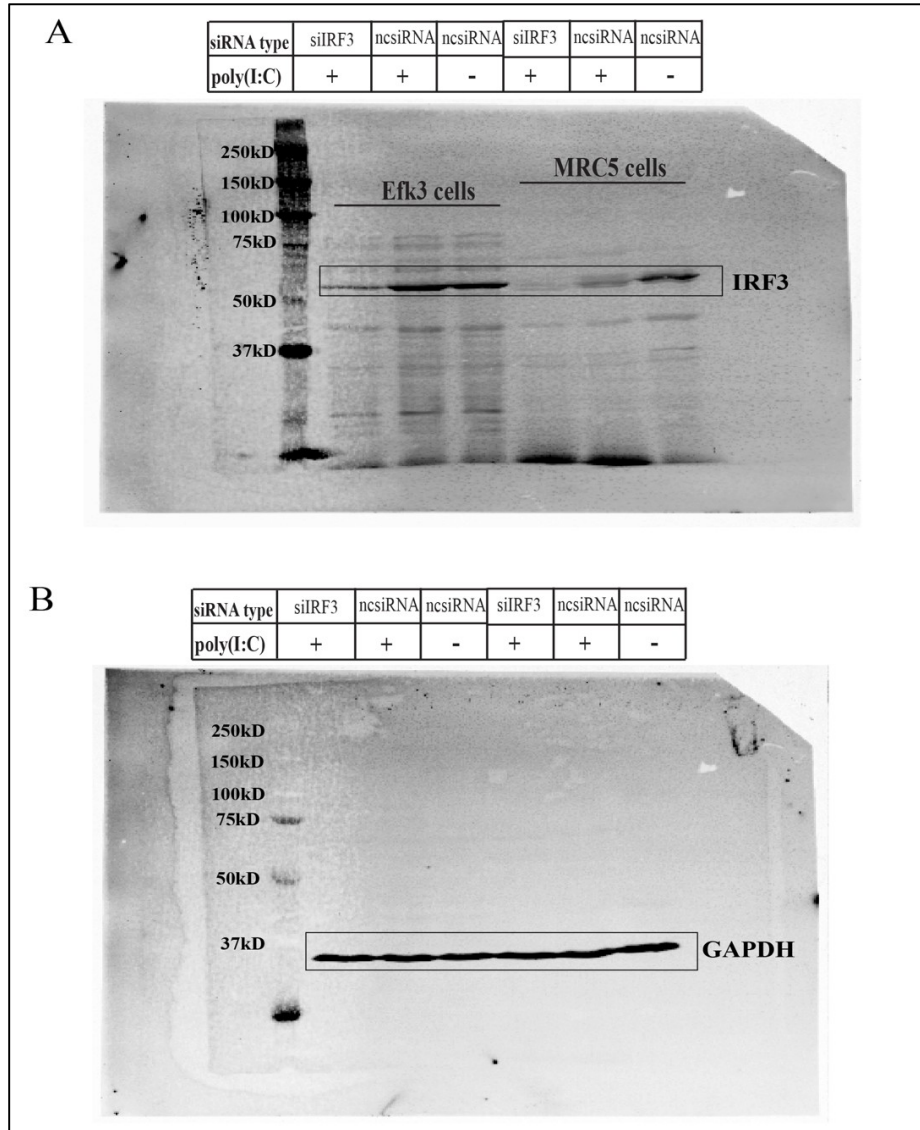

**Figure S2.** Full size blots for Figures 4A and 4B.

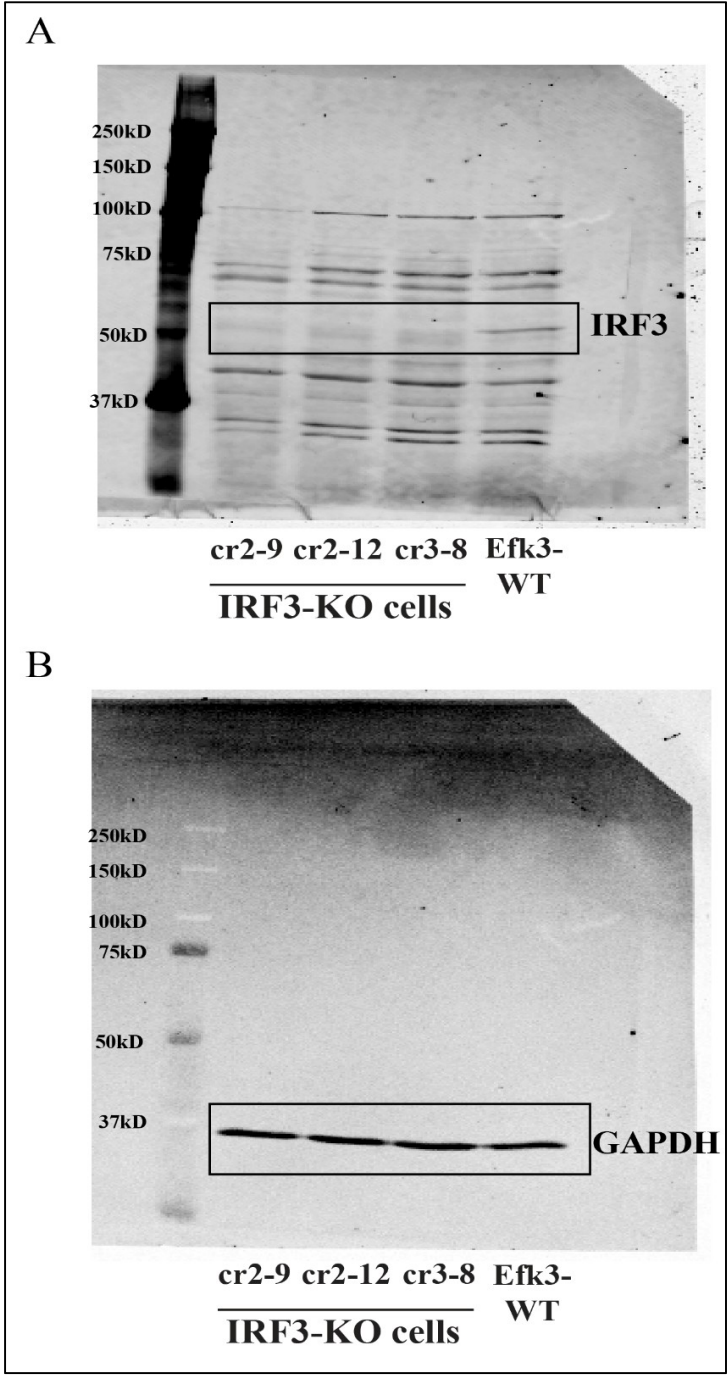

**Figure S3.** Full size blots for Figure 4D.

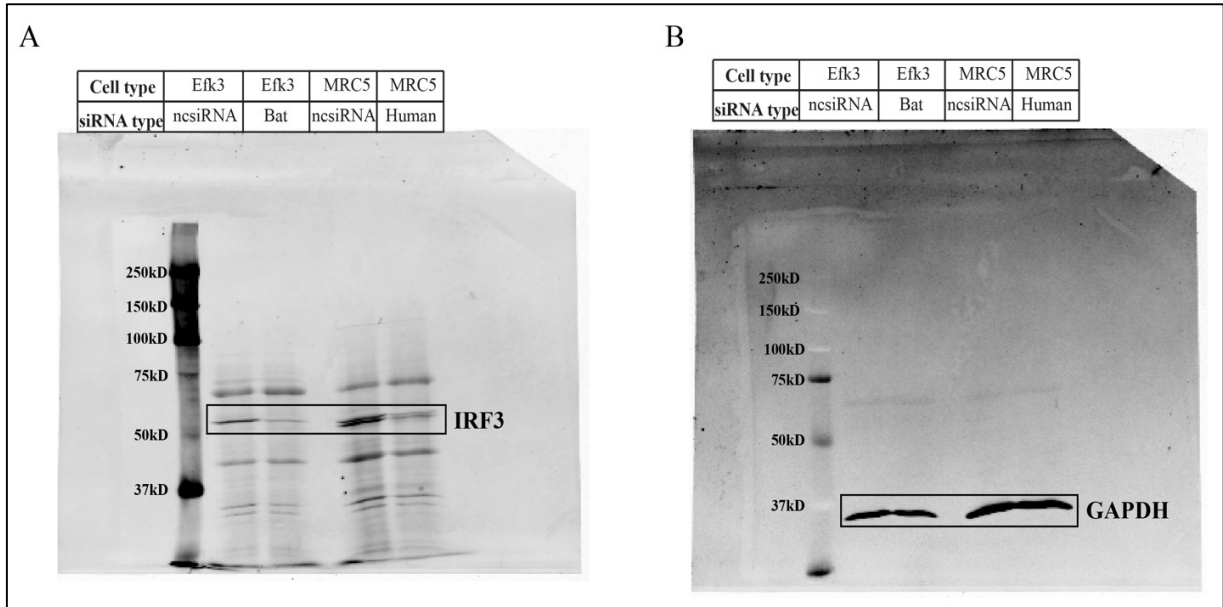

**Figure S4.** Full size blots for Figure 5A.
